# Supplementary material
Source: publisher figshare collection journal article supplement (https://frontiersin.figshare.com/ndownloader/files/14690135)
Supplement: Supplementary file 1 [file 14690135]

**Supplemental Table 4: P values of model comparisons**

|                                   |         |
|-----------------------------------|---------|
| Null model to State Model         | < 0.001 |
| US State model to Ecoregion model | <0.001  |
| Null Model to Disturbance model   | <0.001  |
| Florida to ecoregion              | <0.001  |
| Oregon to ecoregion               | <0.001  |

**Supplemental Table 5: Parameter values of curves**

|                                                   | A      | B      | C      | Sigma  |                   |
|---------------------------------------------------|--------|--------|--------|--------|-------------------|
| All data                                          | 0.9700 | 3.337  | 0.5858 | 0.0688 | Null Model        |
| Oregon                                            | 0.9873 | 3.377  | 0.5596 | 0.0784 | US State Model    |
| Florida                                           | 0.9432 | 3.2075 | 0.6272 | 0.0492 |                   |
| Marine West Coast Forest                          | 0.9654 | 3.5127 | 0.6442 | 0.0501 | Ecoregion Model   |
| Western Cordillera                                | 0.9958 | 3.2727 | 0.5237 | 0.0836 |                   |
| Southeastern USA Plains                           | 0.9376 | 3.3096 | 0.6477 | 0.0475 |                   |
| Mississippi Alluvial and Southeast Coastal Plains | 0.9475 | 3.1364 | 0.6121 | 0.0503 |                   |
| Wildfire                                          | 0.9836 | 2.6202 | 0.6165 | 0.0328 | Disturbance Model |
| Clearcut                                          | 0.9851 | 2.1984 | 0.5576 | 0.0192 |                   |
| Herbicide                                         | 0.732  | 4.011  | 0.889  | -0.469 |                   |
| other mechanical                                  | 1.0039 | 2.8596 | 0.4492 | 0.0918 |                   |
| Prescribed Fire                                   | 0.9633 | 3.7391 | 0.7263 | 0.0324 |                   |
| Unknown                                           | 0.9454 | 3.3184 | 0.6388 | 0.0484 |                   |
| Thinning                                          | 0.9358 | 4.0150 | 0.8209 | 0.0253 |                   |
